# Supplementary material
Source: PubMed Central journal article supplement (PMC6291017)

# Supplemental Figure 1

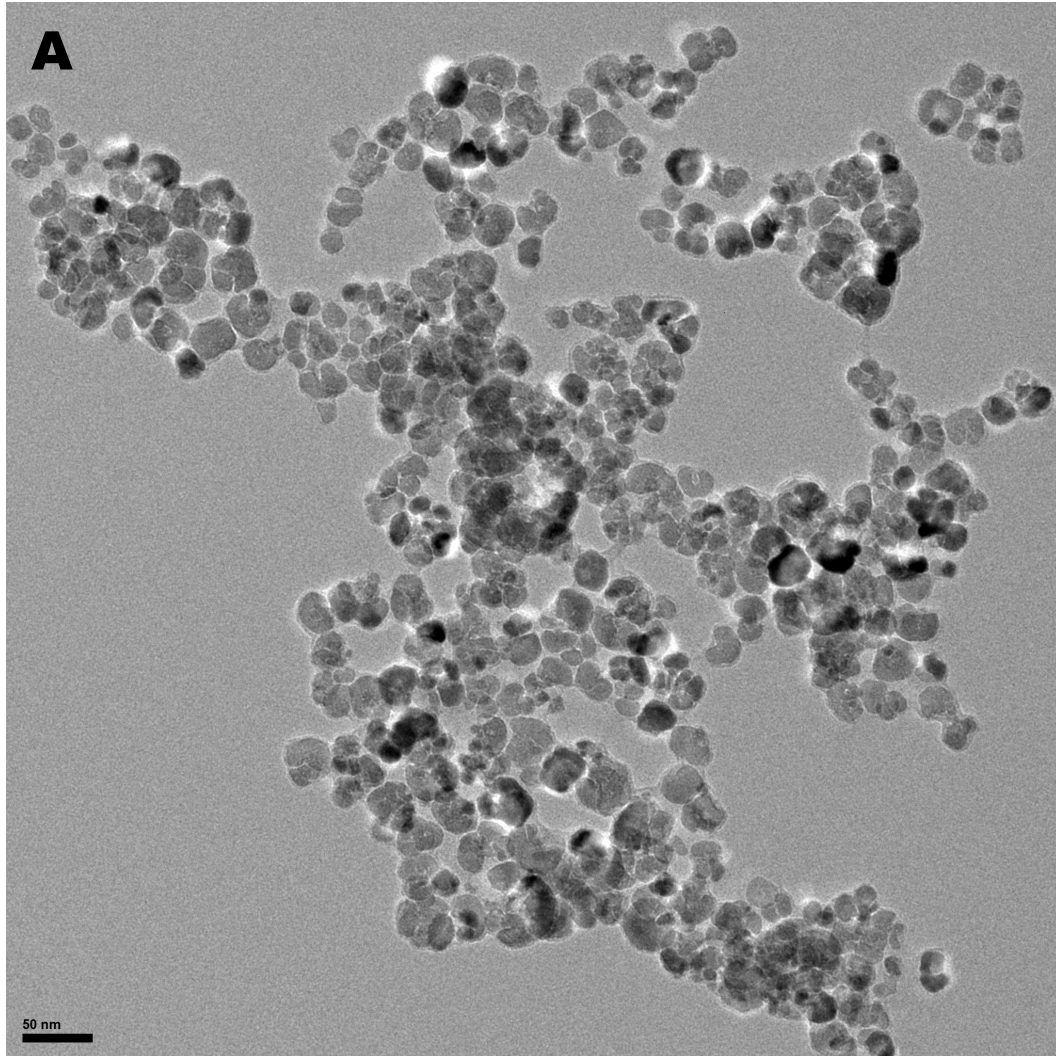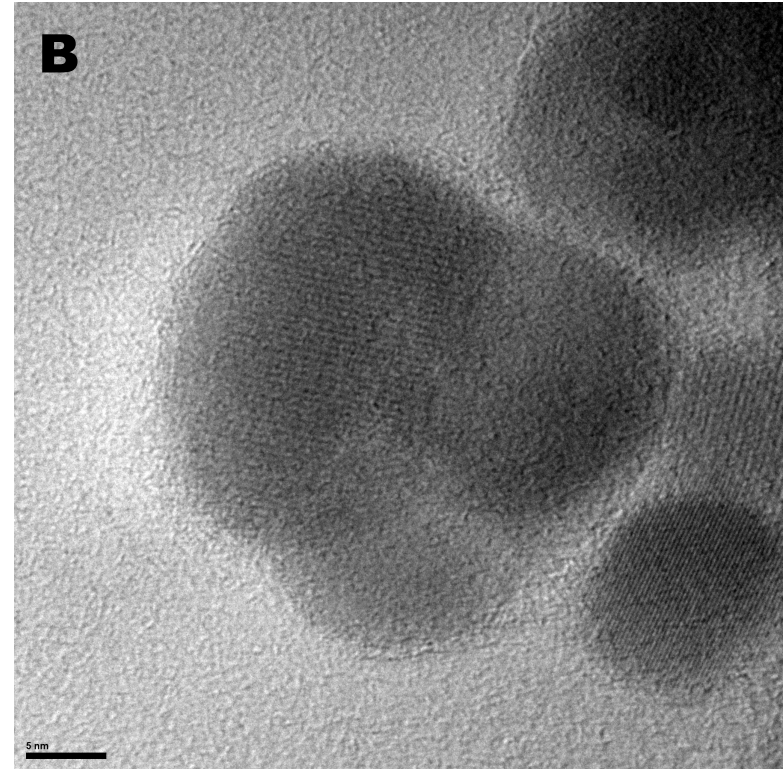

# Supplemental Figure 2

MTT: 25  $\mu\text{g}/\text{mL}$

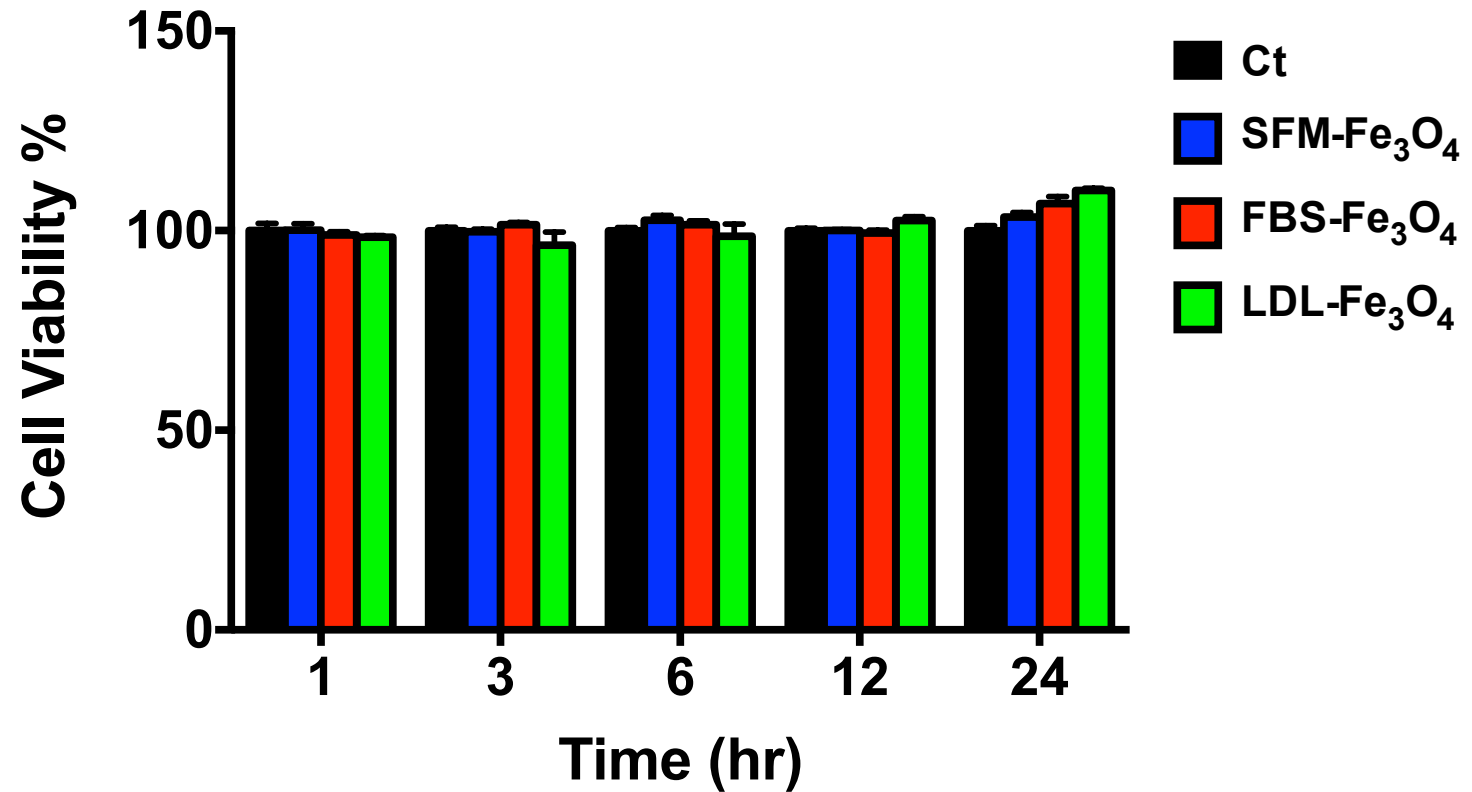

# Supplemental Figure 3

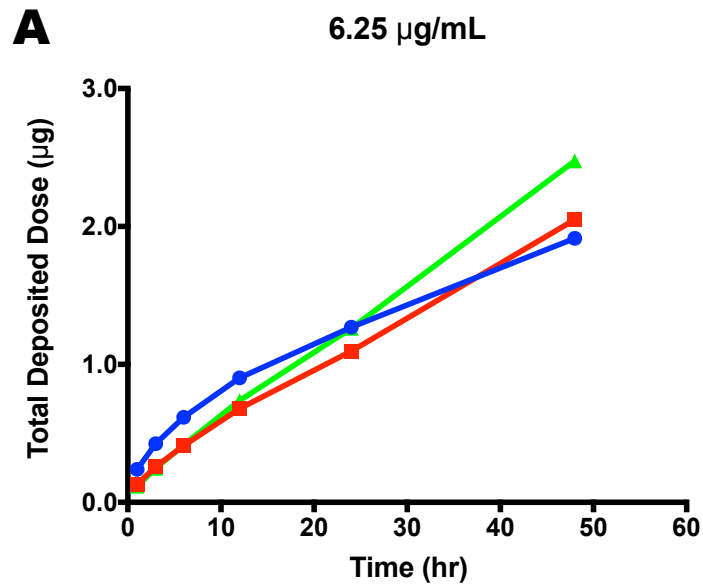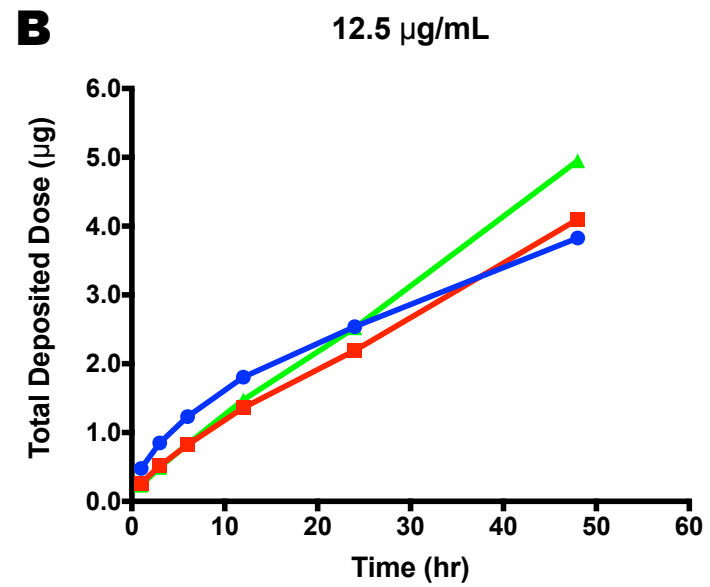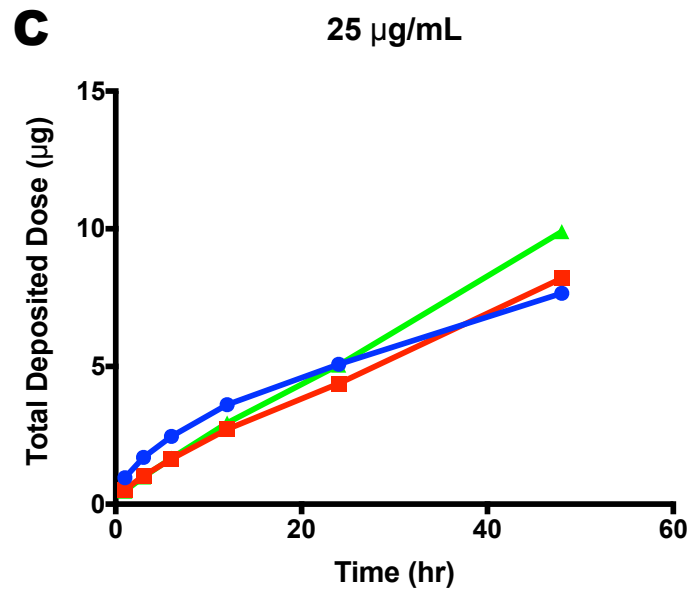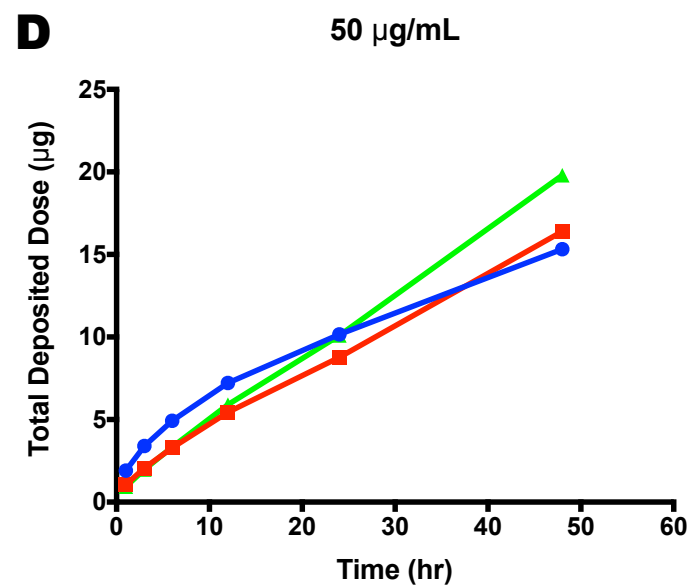

● SFM- $\text{Fe}_3\text{O}_4$     ■ FBS- $\text{Fe}_3\text{O}_4$     ▲ LDL- $\text{Fe}_3\text{O}_4$

# Supplemental Figure 4

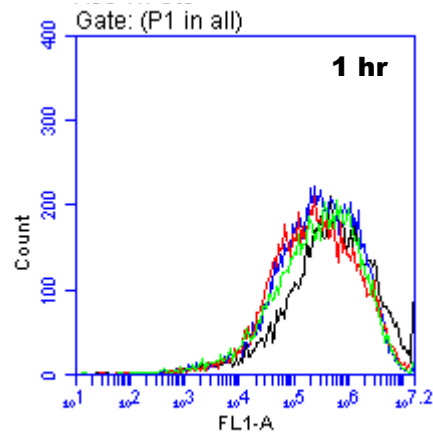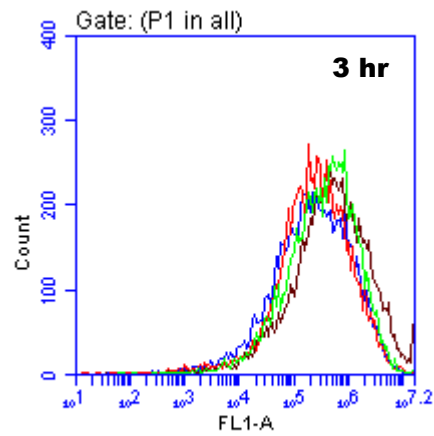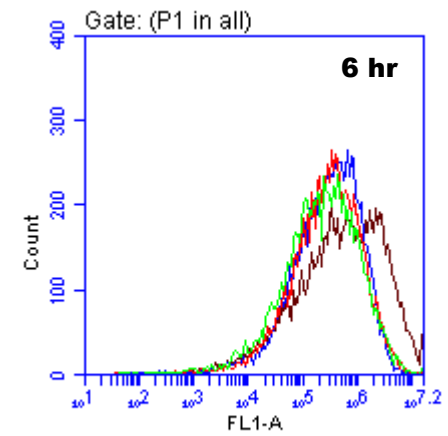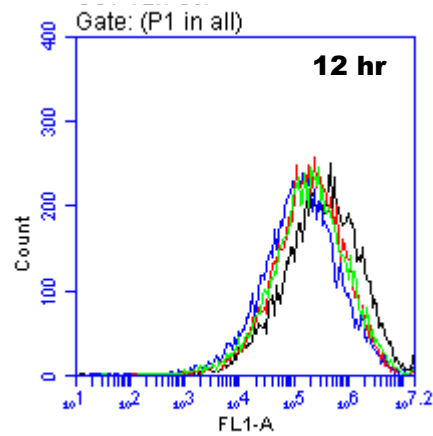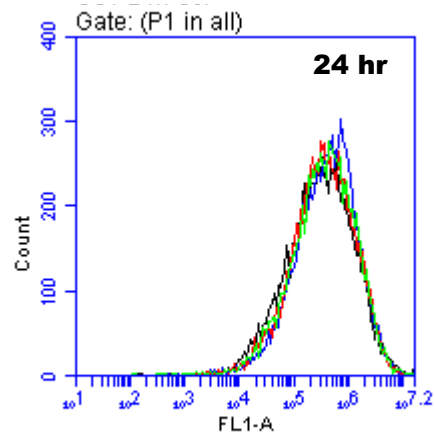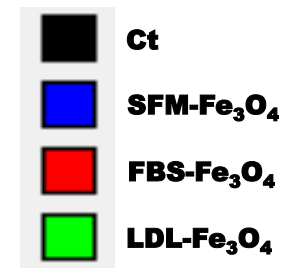

Supplement: NIHMS995230-supplement-Supplemental_data.pdf [file NIHMS995230-supplement-Supplemental_data.pdf]
